# Supplementary material
Source: Springer Nature journal article supplement (https://www.springermedizin.de/resource/supplementary/12884_2012_680_MOESM2_ESM.pdf/9457812)
Supplement: MOESM2 [file 9457812]

## Appendix 2

### Excluded studies and the reason for the exclusion

#### No variable of maternal morbidity

- AHLUND, S., CLARKE, P., HILL, J. & THALANGE, N. K. S. 2009. Post-traumatic stress symptoms in mothers of very low birth weight infants 2-3 years post-partum. *Archives of Womens Mental Health*, 12, 261-264.
- ALLEN, S. F. C. 1996. *An investigation of post-traumatic stress disorder symptoms following traumatic labour experiences : causal factors, mediating variables and consequences. [electronic resource]*. Thesis (Ph.D.), University of Southampton.
- ANDERSON, C. & LOGAN, D. 2010. Impact of traumatic birth experience on Latina adolescent mothers. *Issues Ment Health Nurs*, 31, 700-7.
- AYERS, S., HARRIS, R., SAWYER, A., PARFITT, Y. & FORD, E. 2009. *Posttraumatic stress disorder after childbirth: Analysis of symptom presentation and sampling*, *Journal of Affective Disorders*. 119 (1-3) (pp 200-204), 2009. Date of Publication: January 2009.
- AYERS, S. & PICKERING, A. D. 2001. Do women get posttraumatic stress disorder as a result of childbirth? A prospective study of incidence. *Birth-Issues in Perinatal Care*, 28, 111-118.
- BAILHAM, D. 2001. *Psychological trauma following childbirth. [electronic resource]*. Thesis (Ph.D.), University of Warwick.
- CZARNOCKA, J. & SLADE, P. 2000. Prevalence and predictors of post-traumatic stress symptoms following childbirth. *British Journal of Clinical Psychology*, 39, 35-51.
- BECK, C. T., GABLE, R. K., SAKALA, C. & DECLERCQ, E. R. 2011. Posttraumatic Stress Disorder in New Mothers: Results from a Two-Stage U.S. National Survey. *Birth*, 38, 216-227.
- DAVIES, J., SLADE, P., WRIGHT, I. & STEWART, P. 2008. *Posttraumatic stress symptoms following childbirth and mothers' perceptions of their infants*, *Infant Mental Health Journal*. 29 (6) (pp 537-554), 2008. Date of Publication: 2008.
- DAVIS, L., EDWARDS, H., MOHAY, H. & WOLLIN, J. 2003. The impact of very premature birth on the psychological health of mothers. *Early Human Development*, 73, 61-70.
- DEMIER, R. L., HYNAN, M. T., HARRIS, H. B. & MANNIELLO, R. L. 1996. Perinatal stressors as predictors of symptoms of posttraumatic stress in mothers of infants at high risk. *Journal of Perinatology*, 16, 276-80.
- DENIS, A., PARANT, O. & CALLAHAN, S. 2011. *Post-traumatic stress disorder related to birth: A prospective longitudinal study in a French population*, *Journal of Reproductive and Infant Psychology*. 29 (2) (pp 125-135), 2011. Date of Publication: April 2011.
- ELHAI, J. D., FRUEH, B. C., GOLD, P. B., HAMNER, M. B. & GOLD, S. N. 2003. Posttraumatic Stress, Depression and Dissociation as Predictors of MMPI-2 Scale 8 Scores in Combat Veterans with PTSD. *Journal of Trauma & Dissociation*, 4, 51-64.
- ELKLIT, A., HARTVIG, T. & CHRISTIANSEN, M. 2007. *Psychological sequelae in parents of extreme low and very low birth weight infants*, *Journal of Clinical Psychology in Medical Settings*. 14 (3) (pp 238-247), 2007. Date of Publication: Sep 2007.
- FAIRBROTHER, N. & WOODY, S. R. 2007. Fear of childbirth and obstetrical events as predictors of postnatal symptoms of depression and post-traumatic stress disorder. *Journal of Psychosomatic Obstetrics & Gynecology*, 28, 239-42.
- FEELEY, N., ZELKOWITZ, P., CORMIER, C., CHARBONNEAU, L., LACROIX, A. & PAPAGEORGIOU, A. 2011. Posttraumatic stress among mothers of very low birthweight infants at 6 months after discharge from the neonatal intensive care unit. *Applied Nursing Research*, 24, 114-7.
- FORD, E., AYERS, S. & BRADLEY, R. 2010. Exploration of a cognitive model to predict post-traumatic stress symptoms following childbirth. *Journal of Anxiety Disorders*, 24, 353-9.
- GAMBLE, J., CREEDY, D., MOYLE, W., WEBSTER, J., MCALLISTER, M. & DICKSON, P. 2005. Effectiveness of a counseling intervention after a traumatic childbirth: a randomized controlled trial. *Birth (Berkeley, Calif.)* [Online]. Available: <http://www.mrw.interscience.wiley.com/cochrane/clcentral/articles/141/CN-00513141/frame.html>.
- HOLDITCH-DAVIS, D., BARTLETT, T. R., BLICKMAN, A. L. & MILES, M. S. 2003. *Posttraumatic stress symptoms in mothers of premature infants*, *Journal of obstetric, gynecologic, and neonatal nursing : JOGNN / NAACOG*. 32 (2) (pp 161-171), 2003. Date of Publication: 2003 Mar-Apr.
- ILES, J., SLADE, P. & SPIBY, H. 2011. *Posttraumatic stress symptoms and postpartum depression in couples after childbirth: The role of partner support and attachment*, *Journal of Anxiety Disorders*. 25 (4) (pp 520-530), 2011. Date of Publication: May 2011.
- KEOGH, E., AYERS, S. & FRANCIS, H. 2002. Does anxiety sensitivity predict post-traumatic stress symptoms following childbirth? A preliminary report. *Cognitive Behaviour Therapy*, 31, 145-155.
- KERSTING, A., KROKER, K., STEINHARD, J., HOERNIG-FRANZ, I., WESSELMANN, U., LUEDORFF, K., OHRMANN, P., AROLT, V. & SUSLOW, T. 2009. *Psychological impact on women after second and third trimester termination of pregnancy due to fetal anomalies versus women after preterm birth-a 14-month follow up study*, *Archives of Women's Mental Health*. 12 (4) (pp 193-201), 2009. Date of Publication: August 2009.
- LEEDS, L. & HARGREAVES, I. 2008. *The psychological consequences of childbirth*, *Journal of Reproductive and Infant Psychology*. 26 (2) (pp 108-122), 2008. Date of Publication: May 2008.
- LEFKOWITZ, D. S., BAXT, C. & EVANS, J. R. 2010. Prevalence and correlates of posttraumatic stress and postpartum depression in parents of infants in the Neonatal Intensive Care Unit (NICU). *Journal of Clinical Psychology in Medical Settings*, 17, 230-7.
- LYONS, S. 1998. *A prospective study of post traumatic stress symptoms 1 month following childbirth in a group of 42 first-time mothers*, *Journal of Reproductive and Infant Psychology*. 16 (2-3) (pp 91-105), 1998. Date of Publication: 1998.
- MENAGE, J. 1993. Post-traumatic stress disorder in women who have undergone obstetric and/or gynaecological procedures. *Journal of Reproductive and Infant Psychology*, 11, 221-228.
- ONOYE, J. M., GOEBERT, D., MORLAND, L., MATSU, C. & WRIGHT, T. 2009. PTSD and postpartum mental health in a sample of Caucasian, Asian, and Pacific Islander women. *Archives of Women's Mental Health*, 12, 393-400.
- PRIEST, S. R., HENDERSON, J., EVANS, S. F. & HAGAN, R. 2003. Stress debriefing after childbirth: a randomised controlled trial. *The Medical journal of Australia* [Online]. Available: <http://www.mrw.interscience.wiley.com/cochrane/clcentral/articles/738/CN-00437738/frame.html>.

- SALVESEN, K. A., OYEN, L., SCHMIDT, N., MALT, U. F. & EIK-NES, S. H. 1997. Comparison of long-term psychological responses of women after pregnancy termination due to fetal anomalies and after perinatal loss. *Ultrasound in Obstetrics & Gynecology*, 9, 80-5.
- SELKIRK, R., MCLAREN, S., OLLERENSHAW, A., MCLACHLAN, A. J. & MOTEN, J. 2006. *The longitudinal effects of midwife-led postnatal debriefing on the psychological health of mothers*, Journal of Reproductive and Infant Psychology. 24 (2) (pp 133-147), 2006. Date of Publication: May 2006.
- SKARI, H., MALT, U. F., BJORNLAND, K., EGELAND, T., HAUGEN, G., SKREDEN, M., DALHOLT BJORK, M., BJORNSTAD OSTENSEN, A. & EMBLEM, R. 2006. Prenatal diagnosis of congenital malformations and parental psychological distress—a prospective longitudinal cohort study. *Prenat Diagn*, 26, 1001-9.
- SKARI, H., SKREDEN, M., MALT, U. F., DALHOLT, M., OSTENSEN, A. B., EGELAND, T. & EMBLEM, R. 2002. Comparative levels of psychological distress, stress symptoms, depression and anxiety after childbirth - A prospective population-based study of mothers and fathers.
- SODERQUIST, J., WIJMA, B., THORBERT, G. & WIJMA, K. 2009. Risk factors in pregnancy for post-traumatic stress and depression after childbirth. *BJOG: An International Journal of Obstetrics & Gynaecology*, 116, 672-80.
- SODERQUIST, J., WIJMA, B. & WIJMA, K. 2006. The longitudinal course of post-traumatic stress after childbirth. *Journal of Psychosomatic Obstetrics & Gynecology*, 27, 113-9.
- SODERQUIST, J., WIJMA, K. & WIJMA, B. 2002. Traumatic stress after childbirth: The role of obstetric variables.
- SOET, J. E., BRACK, G. A. & DIORIO, C. 2003. Prevalence and predictors of women's experience of psychological trauma during childbirth. *Birth*, 30, 36-46.
- VAN SON, M. J. M., VERKERK, G., VAN DER HART, O., KOMPROE, I. & POP, V. 2005. Prenatal depression, mode of delivery and perinatal dissociation as predictors of postpartum posttraumatic stress: An empirical study.
- VANDERBILT, D., BUSHLEY, T., YOUNG, R. & FRANK, D. A. 2009. Acute posttraumatic stress symptoms among urban mothers with newborns in the neonatal intensive care unit: a preliminary study. *Journal of Developmental & Behavioral Pediatrics*, 30, 50-6.
- WENZEL, A., HAUGEN, E. N., JACKSON, L. C. & BRENDLE, J. R. 2005. Anxiety symptoms and disorders at eight weeks postpartum. *Journal of Anxiety Disorders*, 19, 295-311.
- WHITE, T., MATTHEY, S., BOYD, K. & BARNETT, B. 2006. *Postnatal depression and post-traumatic stress after childbirth: Prevalence, course and co-occurrence*, Journal of Reproductive and Infant Psychology. 24 (2) (pp 107-120), 2006. Date of Publication: May 2006.
- WIJMA, K., SODERQUIST, J. & WIJMA, B. 1997a. Posttraumatic stress disorder after childbirth: a cross sectional study. *Journal of Anxiety Disorders*, 11, 587-97.
- ZAERS, S., WASCHKE, M. & EHLERT, U. 2008. Depressive symptoms and symptoms of post-traumatic stress disorder in women after childbirth. *Journal of Psychosomatic Obstetrics & Gynecology*, 29, 61-71.
- ZANARDO, V., GAMBINA, I., BEGLEY, C., LITTA, P., COSMI, E., GIUSTARDI, A. & TREVISANUTO, D. 2011. Psychological distress and early lactation performance in mothers of late preterm infants. *Early Human Development*, 87, 321-3.

#### Assessed different dimensions of psychological issues

- ANDERSSGAARD, A. B., HERBST, A., JOHANSEN, M., BORGSTROM, A., BILLE, A. G. & OIAN, P. 2009. Follow-up interviews after eclampsia.
- FILIPPI, V., GOUFODJI, S., SISMANIDIS, C., KANHONOU, L., FOTTRELL, E., RONSMANS, C., ALIHONOU, E. & PATEL, V. 2010. Effects of severe obstetric complications on women's health and infant mortality in Benin. *Tropical Medicine & International Health*, 15, 733-742.
- FOTTRELL, E., KANHONOU, L., GOUFODJI, S., BEHAGUE, D. P., MARSHALL, T., PATEL, V. & FILIPPI, V. 2010. Risk of psychological distress following severe obstetric complications in Benin: the role of economics, physical health and spousal abuse. *British Journal of Psychiatry*, 196, 18-25.
- LEENERS, B., STILLER, R., NEUMAIER-WAGNER, P., KUSE, S., SCHMITT, A. & RATH, W. 2008. Psychosocial distress associated with treatment of hypertensive diseases in pregnancy. *Psychosomatics*, 49, 413-419.
- REP, A., GANZEVOORT, W., BONSEL, G. J., HANS, W. & DE VRIES, J. I. P. 2007. Psychosocial impact of early-onset hypertensive disorders and related complications in pregnancy. *American Journal of Obstetrics and Gynecology*, 197.
- ROES, E. M., RAIJMAKERS, M. T. M., SCHOONENBERG, M., WANNER, N., PETERS, W. H. M. & STEEGERS, E. A. P. 2005. Physical well-being in women with a history of severe preeclampsia. *Journal of Maternal-Fetal & Neonatal Medicine*, 18, 39-45.
- UKPONG, D. I. 2011. Factors associated with psychological morbidity in mothers of pre-term infants: a study from Wesley Guild Hospital, Nigeria. *Journal of Obstetrics & Gynaecology*, 31, 146-8.
- WHITE, O., MCCORRY, N. K., SCOTT-HEYES, G., DEMPSTER, M. & MANDERSON, J. 2008. Maternal appraisals of risk, coping and prenatal attachment among women hospitalised with pregnancy complications. *Journal of Reproductive and Infant Psychology*, 26, 74-85.

#### Maternal morbidity clustered together with other independent variables and not analysed separately

- CIGOLI, V., GILLI, G. & SAITA, E. 2006. Relational factors in psychopathological responses to childbirth. *Journal of Psychosomatic Obstetrics & Gynecology*, 27, 91-7.
- MAGGIONI, C., MARGOLA, D. & FILIPPI, F. 2006. PTSD, risk factors, and expectations among women having a baby: a two-wave longitudinal study. *Journal of Psychosomatic Obstetrics & Gynecology*, 27, 81-90.

#### No data of maternal morbidity

- LEMOLA, S., STADLMAYR, W. & GROB, A. 2007. *Maternal adjustment five months after birth: The impact of the subjective experience of childbirth and emotional support from the partner*, Journal of Reproductive and Infant Psychology. 25 (3) (pp 190-202), 2007. Date of Publication: Aug 2007.

| <b>No assessment of the association between maternal morbidity and subsequent PTSD/PTSD symptoms</b>                                                                                                                                                                                                                                                                                                                                                                                                                                                                                                                                                                                                                                                                                                                                                                                                                                                                                                                                                                                                                                                                                                                                                                                                                                                                                                                                                                                                                                                                                                                                                                                                                                                                                                                                                                                                                                                                                                                                                                                                                                                                                                                                                                                                                                                                                                                                                            |
|-----------------------------------------------------------------------------------------------------------------------------------------------------------------------------------------------------------------------------------------------------------------------------------------------------------------------------------------------------------------------------------------------------------------------------------------------------------------------------------------------------------------------------------------------------------------------------------------------------------------------------------------------------------------------------------------------------------------------------------------------------------------------------------------------------------------------------------------------------------------------------------------------------------------------------------------------------------------------------------------------------------------------------------------------------------------------------------------------------------------------------------------------------------------------------------------------------------------------------------------------------------------------------------------------------------------------------------------------------------------------------------------------------------------------------------------------------------------------------------------------------------------------------------------------------------------------------------------------------------------------------------------------------------------------------------------------------------------------------------------------------------------------------------------------------------------------------------------------------------------------------------------------------------------------------------------------------------------------------------------------------------------------------------------------------------------------------------------------------------------------------------------------------------------------------------------------------------------------------------------------------------------------------------------------------------------------------------------------------------------------------------------------------------------------------------------------------------------|
| <p>FORD, E. 2008. <i>The role of support and control during birth in the development of post-traumatic stress disorder following childbirth</i>. Thesis (D. Phil.) 1 v. ; 31 cm., University of Sussex.</p> <p>POEL, Y. H. M., SWINKELS, P. &amp; DE VRIES, J. I. P. 2009. Psychological treatment of women with psychological complaints after pre-eclampsia. <i>Journal of Psychosomatic Obstetrics &amp; Gynecology</i>, 30, 65-72.</p> <p>RYDING, E. L., WIJMA, B. &amp; WIJMA, K. 1997. Posttraumatic stress reactions after emergency cesarean section. <i>Acta Obstetrica et Gynecologica Scandinavica</i>, 76, 856-61.</p> <p>THOMPSON, J. F., ROBERTS, C. L. &amp; ELLWOOD, D. A. 2011. Emotional and physical health outcomes after significant primary postpartum haemorrhage (PPH): A multicentre cohort study. <i>Australian &amp; New Zealand Journal of Obstetrics &amp; Gynaecology</i>, 51, 365-371.</p>                                                                                                                                                                                                                                                                                                                                                                                                                                                                                                                                                                                                                                                                                                                                                                                                                                                                                                                                                                                                                                                                                                                                                                                                                                                                                                                                                                                                                                                                                                                                       |
| <b>Letter/commentary/news/short communications</b>                                                                                                                                                                                                                                                                                                                                                                                                                                                                                                                                                                                                                                                                                                                                                                                                                                                                                                                                                                                                                                                                                                                                                                                                                                                                                                                                                                                                                                                                                                                                                                                                                                                                                                                                                                                                                                                                                                                                                                                                                                                                                                                                                                                                                                                                                                                                                                                                              |
| <p>GOLDBECK-WOOD, S. 1996. Post-traumatic stress disorder may follow childbirth. <i>BMJ</i>, 313, 774.</p> <p>GRIEBENOW, J. J. 2006. Healing the trauma: entering motherhood with posttraumatic stress disorder (PTSD). <i>Midwifery Today with International Midwife</i>, 28-31.</p> <p>LOVETT, K. F. 2001. PTSD and stillbirth. <i>British Journal of Psychiatry</i>, 179, 367; author reply 368.</p> <p>MCKENZIE-MCHARG, K. 2004. Traumatic birth: understanding predictors, triggers, and counseling process is essential to treatment. <i>Birth</i>, 31, 219-21.</p> <p>SHARMA, J. B., NEWMAN, M. R. &amp; SMITH, R. J. 1993. Psychological distress and preterm delivery. Consider urogenital infection. <i>BMJ</i>, 307, 934.</p> <p>SHEEHAN, J. D. 2001. PTSD and stillbirth. <i>British Journal of Psychiatry</i>, 179, 368; author reply 368.</p> <p>VYTHILINGUM, B. 2010. <i>Should childbirth be considered a stressor sufficient to meet the criteria for PTSD?</i>, Archives of Women's Mental Health. 13 (1) (pp 49-50), 2010. Date of Publication: February 2010.</p>                                                                                                                                                                                                                                                                                                                                                                                                                                                                                                                                                                                                                                                                                                                                                                                                                                                                                                                                                                                                                                                                                                                                                                                                                                                                                                                                                                           |
| <b>Assessed PTSD in pregnancy</b>                                                                                                                                                                                                                                                                                                                                                                                                                                                                                                                                                                                                                                                                                                                                                                                                                                                                                                                                                                                                                                                                                                                                                                                                                                                                                                                                                                                                                                                                                                                                                                                                                                                                                                                                                                                                                                                                                                                                                                                                                                                                                                                                                                                                                                                                                                                                                                                                                               |
| <p>SENG, J. S., LOW, L. K., SPERLICH, M., RONIS, D. L. &amp; LIBERZON, I. 2009. Prevalence, Trauma History, and Risk for Posttraumatic Stress Disorder Among Nulliparous Women in Maternity Care. <i>Obstetrics and Gynecology</i>, 114, 839-847.</p> <p>SENG, J. S., OAKLEY, D. J., SAMPSELLE, C. M., KILLION, C., GRAHAM-BERMANN, S. &amp; LIBERZON, I. 2001. <i>Posttraumatic stress disorder and pregnancy complications</i>, Obstetrics and Gynecology. 97 (1) (pp 17-22), 2001. Date of Publication: 2001.</p>                                                                                                                                                                                                                                                                                                                                                                                                                                                                                                                                                                                                                                                                                                                                                                                                                                                                                                                                                                                                                                                                                                                                                                                                                                                                                                                                                                                                                                                                                                                                                                                                                                                                                                                                                                                                                                                                                                                                            |
| <b>Qualitative studies or case reports</b>                                                                                                                                                                                                                                                                                                                                                                                                                                                                                                                                                                                                                                                                                                                                                                                                                                                                                                                                                                                                                                                                                                                                                                                                                                                                                                                                                                                                                                                                                                                                                                                                                                                                                                                                                                                                                                                                                                                                                                                                                                                                                                                                                                                                                                                                                                                                                                                                                      |
| <p>BALLARD, C. G., STANLEY, A. K. &amp; BROCKINGTON, I. F. 1995. Post-traumatic stress disorder (PTSD) after childbirth. <i>British Journal of Psychiatry</i>, 166, 525-8.</p> <p>CARTY, S. 2007. <i>Trauma following childbirth [electronic resource]</i>. Thesis (Clin.Psy.D), University of Birmingham 2007.</p> <p>FONES, C. 1996. Posttraumatic stress disorder occurring after painful childbirth. <i>Journal of Nervous &amp; Mental Disease</i>, 184, 195-6.</p> <p>VAN PAMPUS, M. G., WOLF, H., WEIJMAR SCHULTZ, W. C. M., NEELEMAN, J. &amp; AARNOUDSE, J. G. 2004. Posttraumatic stress disorder following pre-eclampsia and HELLP syndrome. <i>Journal of Psychosomatic Obstetrics &amp; Gynecology</i>, 25, 183-7.</p>                                                                                                                                                                                                                                                                                                                                                                                                                                                                                                                                                                                                                                                                                                                                                                                                                                                                                                                                                                                                                                                                                                                                                                                                                                                                                                                                                                                                                                                                                                                                                                                                                                                                                                                             |
| <b>Irrelevant population</b>                                                                                                                                                                                                                                                                                                                                                                                                                                                                                                                                                                                                                                                                                                                                                                                                                                                                                                                                                                                                                                                                                                                                                                                                                                                                                                                                                                                                                                                                                                                                                                                                                                                                                                                                                                                                                                                                                                                                                                                                                                                                                                                                                                                                                                                                                                                                                                                                                                    |
| <p>COOPER, R., MISHRA, G., HARDY, R. &amp; KUH, D. 2009. Hysterectomy and subsequent psychological health: Findings from a British birth cohort study. <i>Journal of Affective Disorders</i>, 115, 122-130.</p> <p>KHASTGIR, G., STUDD, J. W. W. &amp; CATALAN, J. 2000. The psychological outcome of hysterectomy. <i>Gynecological Endocrinology</i>, 14, 132-141.</p> <p>YEN, J.-Y., CHEN, Y.-H., LONG, C.-Y., CHANG, Y., YEN, C.-F., CHEN, C.-C. &amp; KO, C.-H. 2008. Risk factors for major depressive disorder and the psychological impact of hysterectomy: A prospective investigation. <i>Psychosomatics</i>, 49, 137-142.</p>                                                                                                                                                                                                                                                                                                                                                                                                                                                                                                                                                                                                                                                                                                                                                                                                                                                                                                                                                                                                                                                                                                                                                                                                                                                                                                                                                                                                                                                                                                                                                                                                                                                                                                                                                                                                                        |
| <b>Reviews or review protocols that did not look at the association between maternal morbidity and PTSD/PTSD symptoms</b>                                                                                                                                                                                                                                                                                                                                                                                                                                                                                                                                                                                                                                                                                                                                                                                                                                                                                                                                                                                                                                                                                                                                                                                                                                                                                                                                                                                                                                                                                                                                                                                                                                                                                                                                                                                                                                                                                                                                                                                                                                                                                                                                                                                                                                                                                                                                       |
| <p>ALDER, J., STADLMAYR, W., TSCHUDIN, S. &amp; BITZER, J. 2006. Post-traumatic symptoms after childbirth: what should we offer? <i>Journal of Psychosomatic Obstetrics &amp; Gynecology</i>, 27, 107-12.</p> <p>ANDERSEN, L. B., MELVAER, L. B., VIDEBECH, P., LAMONT, R. F. &amp; JOERGENSEN, J. S. 2012. Risk factors for developing post-traumatic stress disorder following childbirth: A systematic review. <i>Acta Obstetrica et Gynecologica Scandinavica</i>, 1-28.</p> <p>AYERS, S. 2004. Delivery as a traumatic event: prevalence, risk factors, and treatment for postnatal posttraumatic stress disorder. <i>Clinical Obstetrics &amp; Gynecology</i>, 47, 552-67.</p> <p>BASTOS, M. H., BICK, D., ROWAN, C. J., SMALL, R. &amp; MCKENZIE-MCHARG, K. 2008. Debriefing for the prevention of psychological trauma in women following childbirth. <i>Cochrane Database of Systematic Reviews</i> [Online]. Available: <a href="http://www.mrw.interscience.wiley.com/cochrane/clsysrev/articles/CD007194/frame.html">http://www.mrw.interscience.wiley.com/cochrane/clsysrev/articles/CD007194/frame.html</a>.</p> <p>BICK, D. &amp; ROWAN, C. 2007. Postnatal maternal mental health: an update on depression and post-traumatic stress disorder following birth. <i>Journal of the Association of Chartered Physiotherapists in Women's Health</i>, 4-13.</p> <p>CLEMENT, S. 2001. Psychological aspects of caesarean section. <i>Best Practice &amp; Research in Clinical Obstetrics &amp; Gynaecology</i>, 15, 109-26.</p> <p>CUMBERBATCH, C.-J., BIRNDORF, C. &amp; DRESNER, N. 2005. Psychological implications of high-risk pregnancy. <i>International Journal of Fertility &amp; Womens Medicine</i>, 50, 180-6.</p> <p>GRIEBENOW, J. J. 2006. Healing the trauma: entering motherhood with posttraumatic stress disorder (PTSD). <i>Midwifery Today with International Midwife</i>, 28-31.</p> <p>OLDE, E., VAN DER HART, O., KLEBER, R. &amp; VAN SON, M. 2006. Posttraumatic stress following childbirth: A review. <i>Clinical Psychology Review</i>, 26, 1-16.</p> <p>REYNOLDS, J. L. 1997. Post-traumatic stress disorder after childbirth: the phenomenon of traumatic birth. <i>CMAJ Canadian Medical Association Journal</i>, 156, 831-5.</p> <p>ROSS, L. E. &amp; MCLEAN, L. M. 2006. Anxiety disorders during pregnancy and the postpartum period: A systematic review. <i>Journal of Clinical Psychiatry</i>, 67, 1285-98.</p> |

SAWYER, A., AYERS, S. & SMITH, H. 2010. Pre- and postnatal psychological wellbeing in Africa: a systematic review. *Journal of Affective Disorders*, 123, 17-29.

STONE, H. L. 2009. Post-traumatic stress disorder in postpartum patients: what nurses can do. *Nursing for Women's Health*, 13, 284-91.

TEDSTONE, J. E. & TARRIER, N. 2003. Posttraumatic stress disorder following medical illness and treatment. *Clinical Psychology Review*, 23, 409-48.

**The same study (published or non-published)**

CREEDY, D. K., SHOCHET, I. M. & HORSFALL, J. 2000. Childbirth and the development of acute trauma symptoms: Incidence and contributing factors. *Birth-Issues in Perinatal Care*, 27, 104-111.
